# Supplementary material
Source: MDPI journal article supplement (https://www.mdpi.com/2673-687X/1/1/3)
Supplement: s1 [file s1]

## Supplementary Materials

### A New Nanomaterial Based Biosensor for MUC1 Biomarker Detection in Early Diagnosis, Tumor Progression and Treatment of Cancer

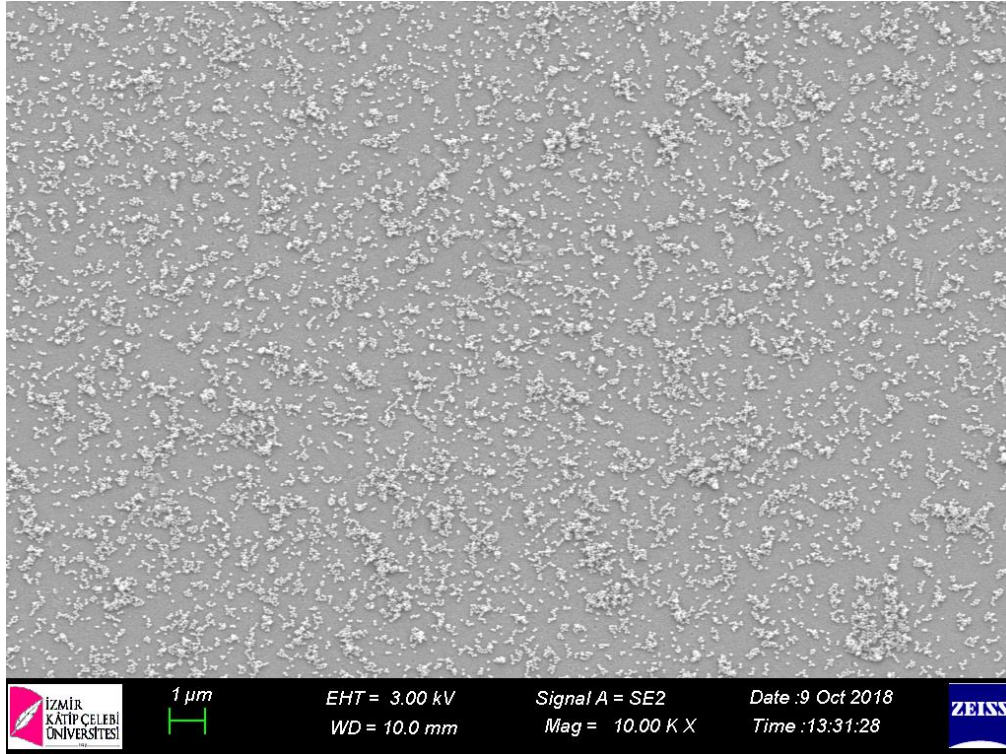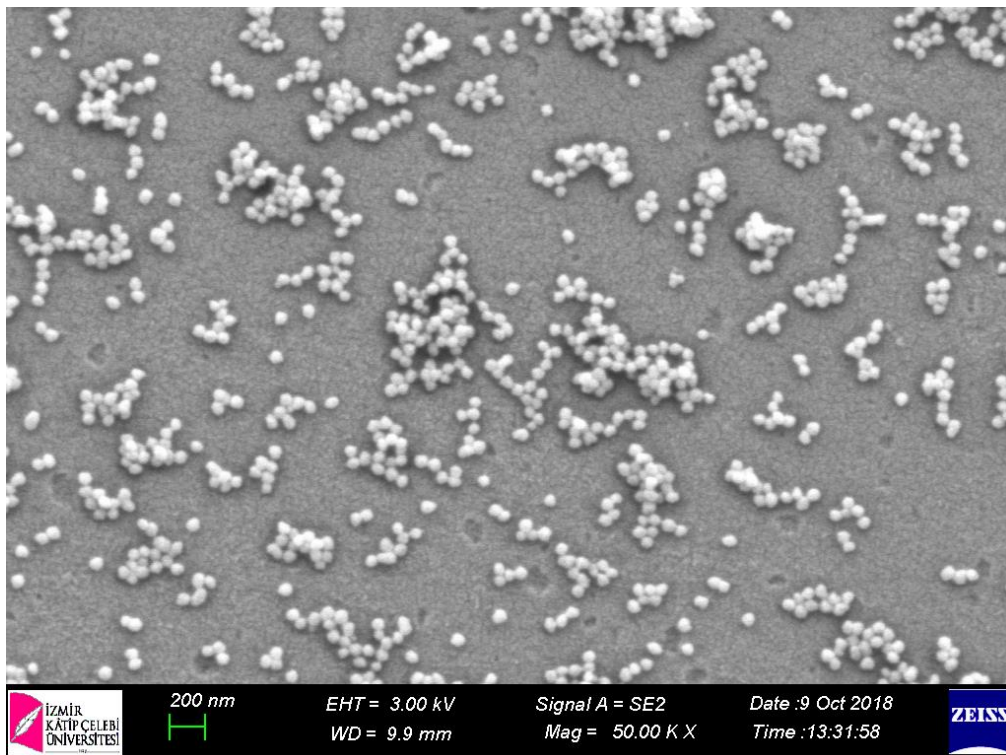

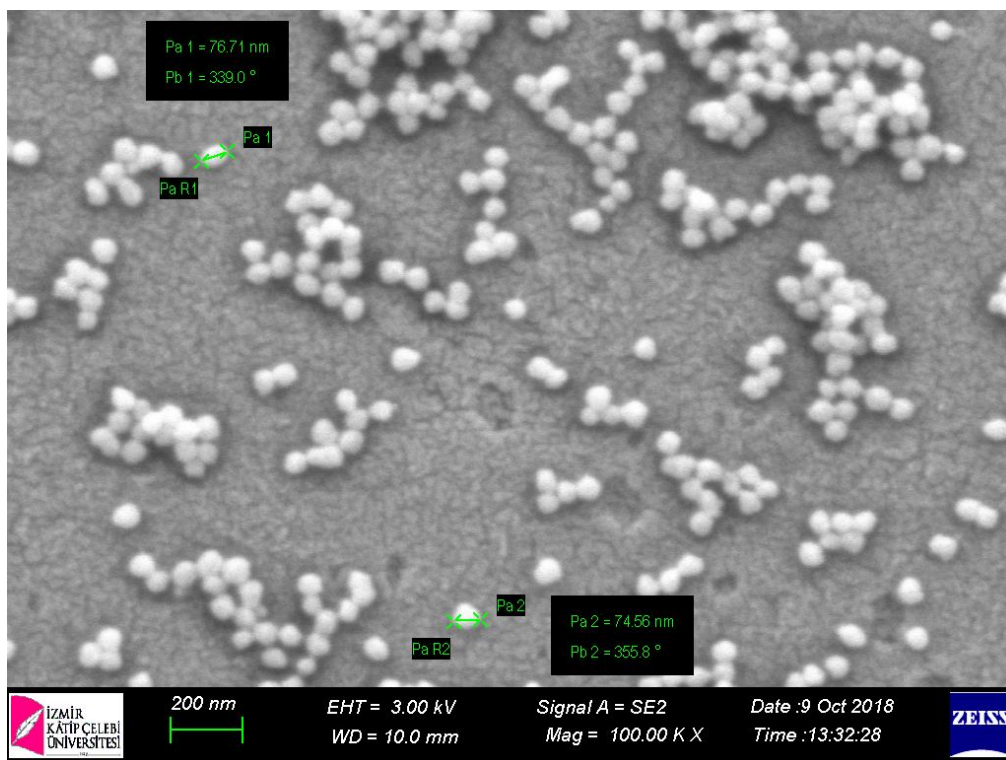

**Figure S1.** SEM images of p(HEMA)-IMEO-ConA nanoparticles (10kx, 50kx, 100kx).

**A**

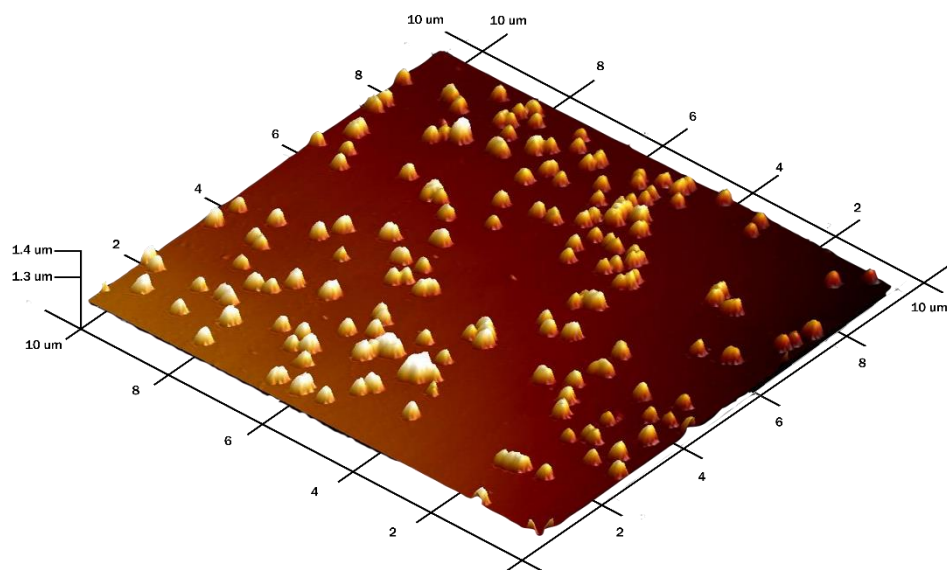

**B**

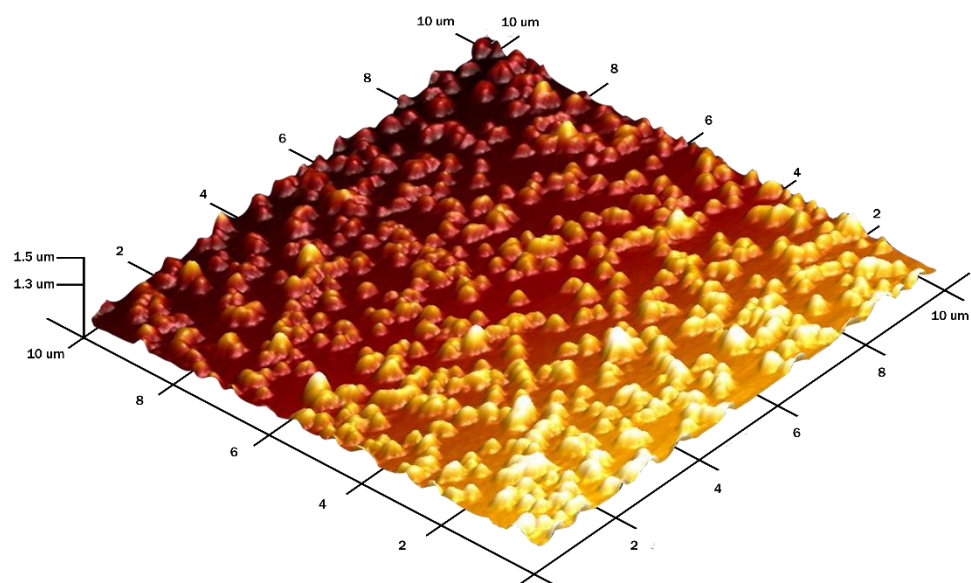

**Figure S2.** AFM images of (A) p(HEMA) and (B) p(HEMA)-IMEO nanoparticles.

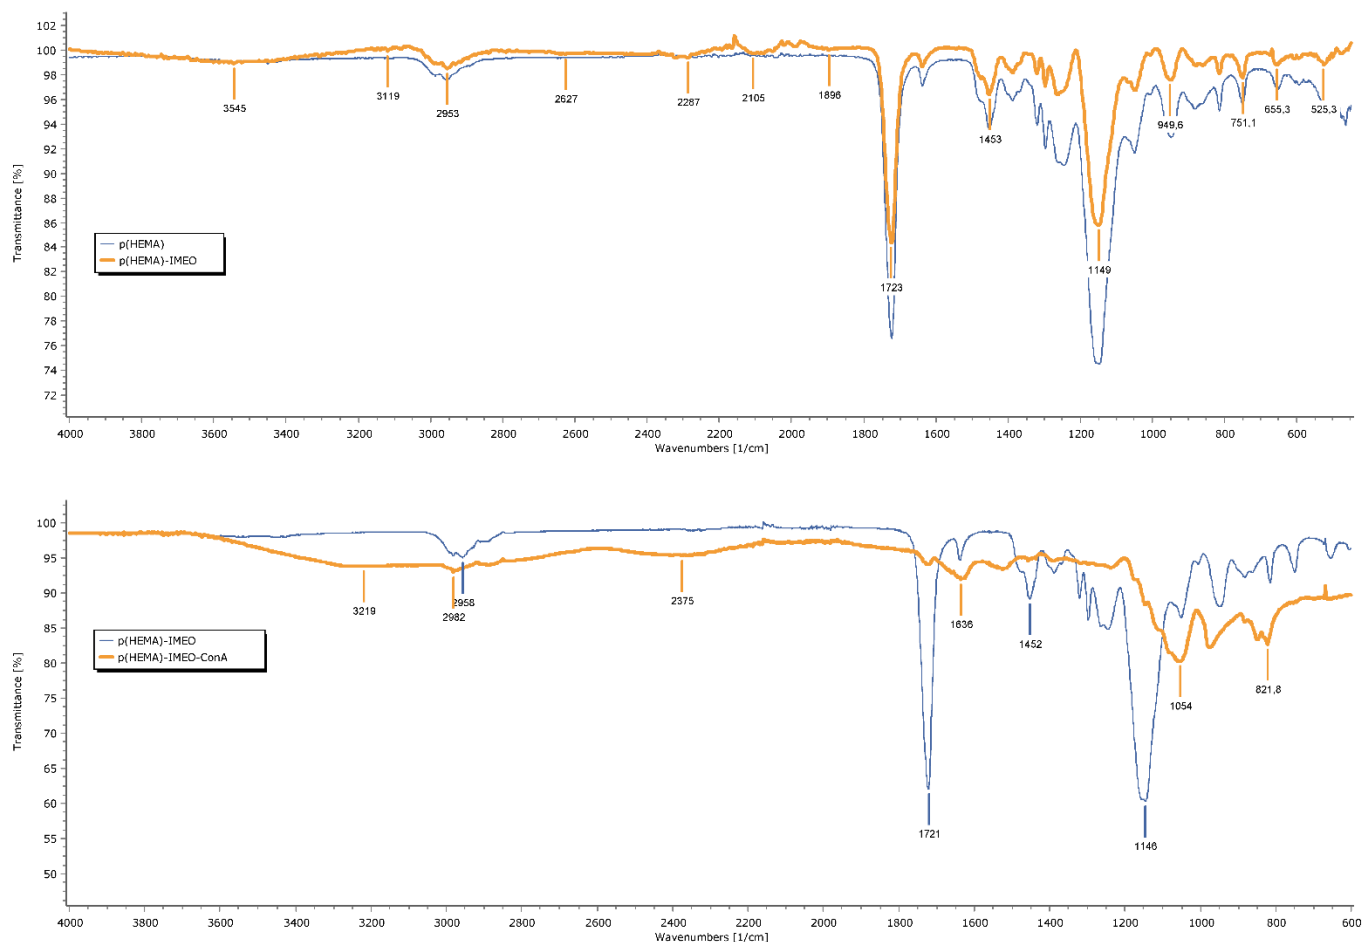

**Figure S3.** FTIR spectrum analysis of p(HEMA), p(HEMA)-IMEO and p(HEMA)-IMEO-ConA.

**A** Results

|                                |                      | % Intensity: | St Dev (d.n... |
|--------------------------------|----------------------|--------------|----------------|
| <b>Z-Average (d.nm):</b> 126.4 | <b>Peak 1:</b> 120.0 | 90.7         | 38.13          |
| <b>Pdl:</b> 0.293              | <b>Peak 2:</b> 4457  | 9.3          | 897.8          |
| <b>Intercept:</b> 0.948        | <b>Peak 3:</b> 0.000 | 0.0          | 0.000          |
| <b>Result quality</b> Good     |                      |              |                |

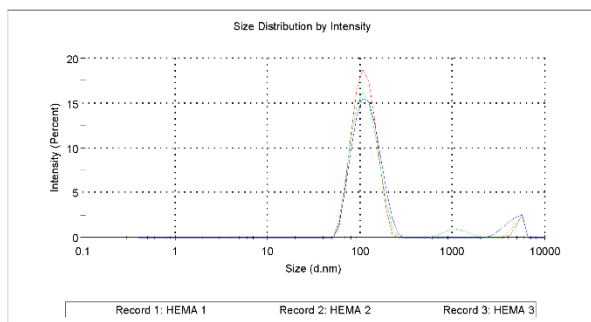

**B**

Results

|                                |                      | % Intensity: | St Dev (d.n... |
|--------------------------------|----------------------|--------------|----------------|
| <b>Z-Average (d.nm):</b> 181.7 | <b>Peak 1:</b> 176.4 | 88.6         | 74.07          |
| <b>Pdl:</b> 0.426              | <b>Peak 2:</b> 4628  | 11.4         | 817.3          |
| <b>Intercept:</b> 0.932        | <b>Peak 3:</b> 0.000 | 0.0          | 0.000          |
| <b>Result quality</b> Good     |                      |              |                |

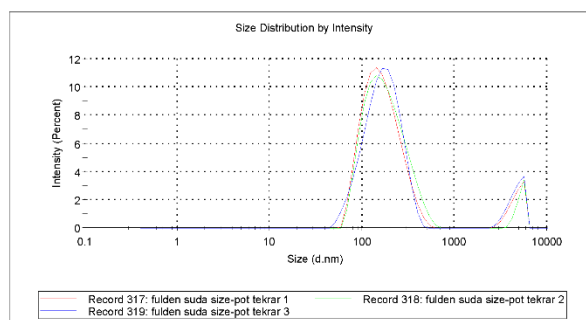

| Polymer           | p(HEMA) | p(HEMA)-IMEO-ConA |
|-------------------|---------|-------------------|
| Average size (nm) | 125.86  | 184.3             |
| PDI               | 0.303   | 0.375             |

**Figure S4.** Zeta size results of (A) p(HEMA) and (B) p(HEMA)-IMEO-ConA nanoparticles.

## A Results

|                                      | Mean (mV)     | Area (%) | St Dev (mV) |
|--------------------------------------|---------------|----------|-------------|
| <b>Zeta Potential (mV): -28.6</b>    | Peak 1: -28.6 | 100.0    | 4.12        |
| <b>Zeta Deviation (mV): 4.12</b>     | Peak 2: 0.00  | 0.0      | 0.00        |
| <b>Conductivity (mS/cm): 0.00544</b> | Peak 3: 0.00  | 0.0      | 0.00        |
| <b>Result quality Good</b>           |               |          |             |

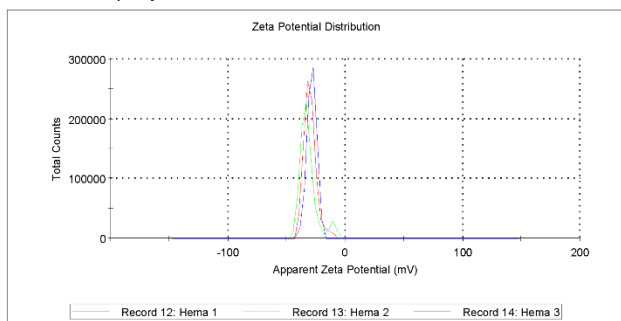

## B Results

|                                     | Mean (mV)     | Area (%) | St Dev (mV) |
|-------------------------------------|---------------|----------|-------------|
| <b>Zeta Potential (mV): -31.0</b>   | Peak 1: -31.0 | 100.0    | 4.06        |
| <b>Zeta Deviation (mV): 4.06</b>    | Peak 2: 0.00  | 0.0      | 0.00        |
| <b>Conductivity (mS/cm): 0.0319</b> | Peak 3: 0.00  | 0.0      | 0.00        |
| <b>Result quality Good</b>          |               |          |             |

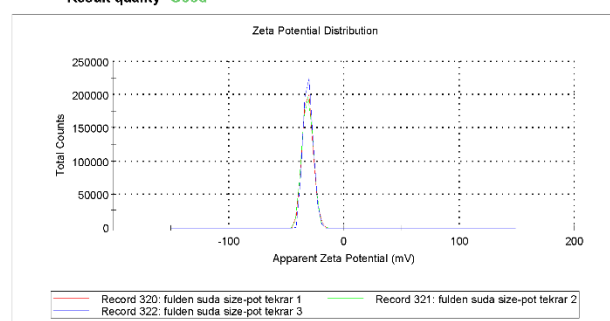

| Repeat             | p(HEMA) | p(HEMA)-IMEO-ConA |
|--------------------|---------|-------------------|
| 1                  | -30     | -31.4             |
| 2                  | -31.6   | -31.4             |
| 3                  | -28.6   | -31               |
| Average            | -30.06  | -31.27            |
| Standart deviation | 1.22    | 0.18              |

**Figure S5.** Zeta potential results of (A) p(HEMA) and (B) p(HEMA)-IMEO-ConA nanoparticles.

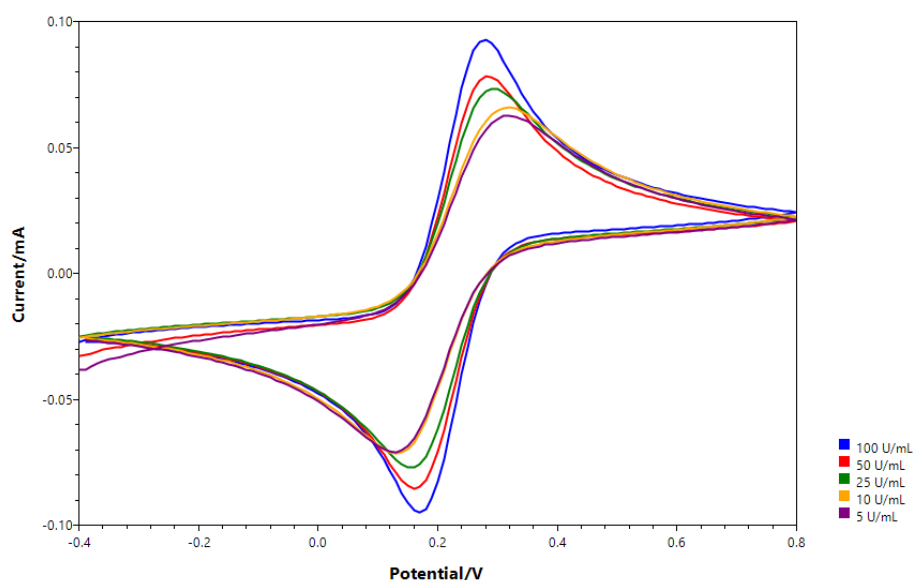

**Figure 6.** CV analysis of p(HEMA)-IMEO-ConA with different MUC1 concentrations (5  $\mu$ L p(HEMA)-IMEO-ConA nanopolymer, 25  $^{\circ}$ C, 90 min, different concentration of MUC1, 25  $^{\circ}$ C, 20 min).

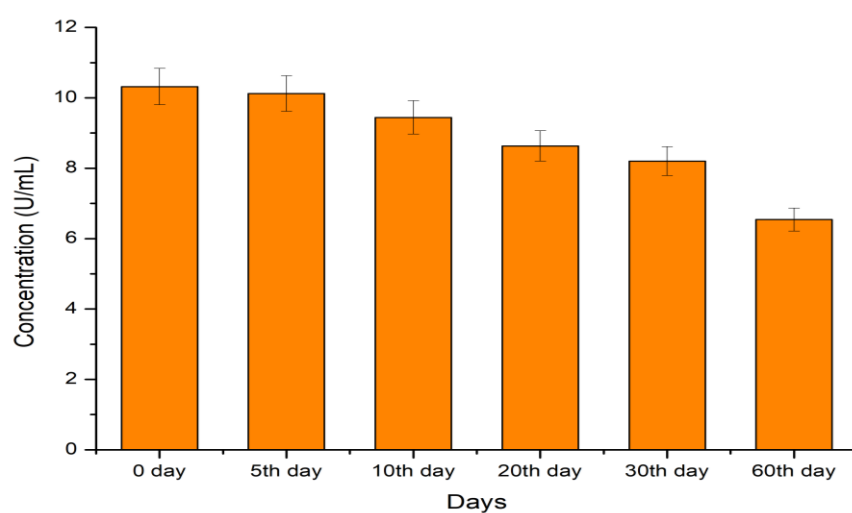

**Figure S7.** Storage stability results (5  $\mu$ L p(HEMA)-IMEO-ConA nanopolymer, 25°C, 90 min, 10 U/mL MUC1, 25°C, 20 min).

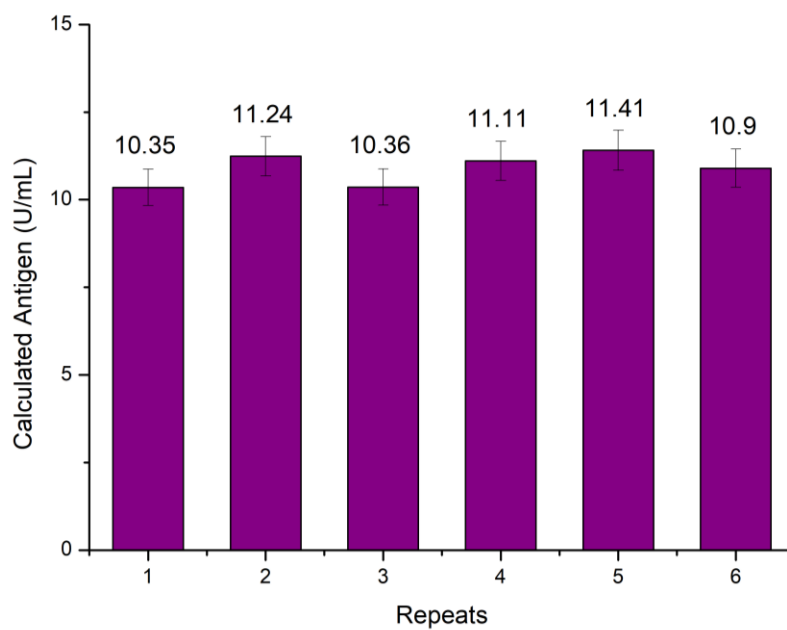

**Figure 8.** Reproducibility results (5  $\mu$ L p(HEMA)-IMEO-ConA nanopolymer, 25 °C, 90 min, 10 U/mL MUC1 + 1 mM MnCl<sub>2</sub>, 1 mM CaCl<sub>2</sub> ion mixture, 25 °C, 20 min).



## Descriptive Statistics

Mean: 10.8950  
 SD: 0.4503  
 # of values: 6  
 Outlier detected? No  
 Significance level: 0.05 (two-sided)  
 Critical value of Z: 1.8871466793

## Your data

| Row | Value | Z      | Significant Outlier?                                                  |
|-----|-------|--------|-----------------------------------------------------------------------|
| 1   | 10.35 | 1.2104 | Furthest from the rest, but not a significant outlier ( $P > 0.05$ ). |
| 2   | 11.24 | 0.7662 |                                                                       |
| 3   | 10.36 | 1.1882 |                                                                       |
| 4   | 11.11 | 0.4775 |                                                                       |
| 5   | 11.41 | 1.1437 |                                                                       |
| 6   | 10.90 | 0.0111 |                                                                       |

**Figure 9.** Grubb test results from Graphpad Online tool.

A

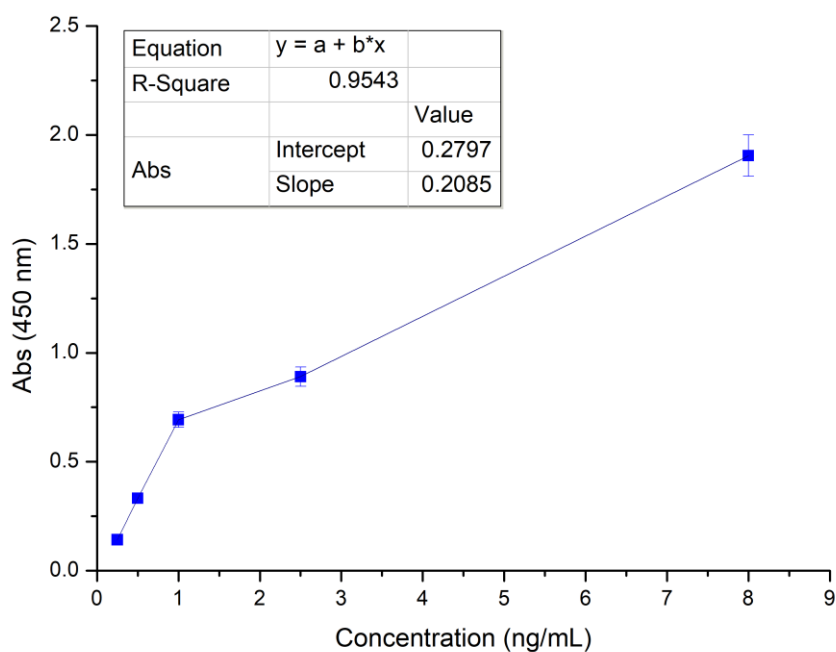

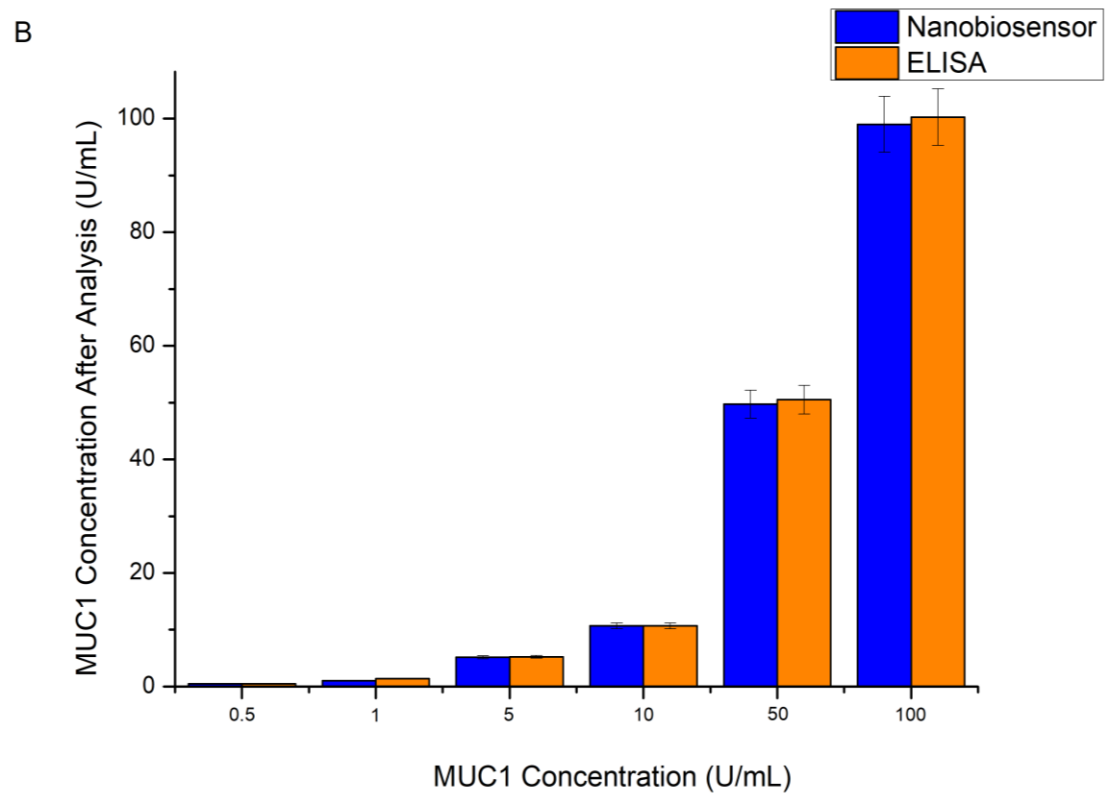

**Figure 10.** Results from comparison of our developed biosensor and a commercial kit (**A**) Calibration curve of ELISA kit (0.25–8 ng/mL), (**B**) Comparison the results of nanobiosensor and MUC1 ELISA kit.
